# Supplementary material
Source: PubMed Central journal article supplement (PMC4004276)
Supplement: bi500091p_si_001.pdf [file bi500091p_si_001.pdf]

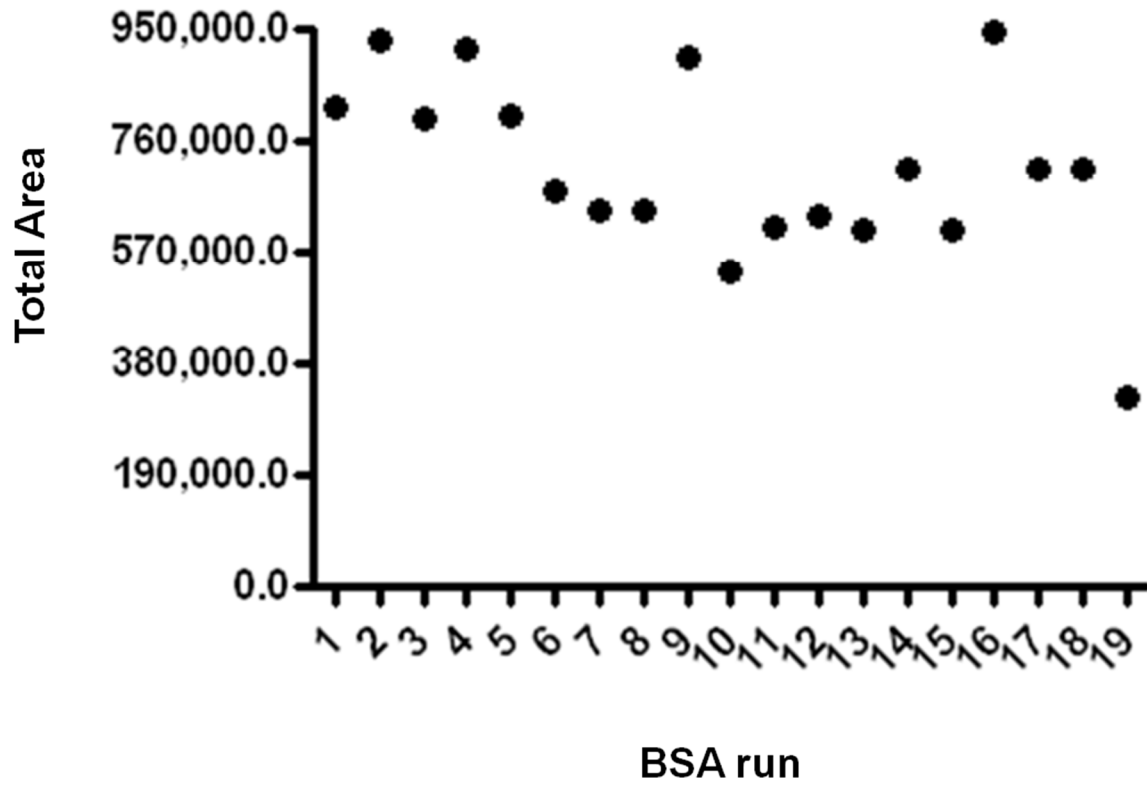

Supplemental Figure 1. Total area under the curve for BSA controls run between experimental samples during MRM experiments. Dots represent total summed area for all peptides being monitored in BSA control samples. BSA runs are arranged in chronological order in which they were analyzed via MRM. CV: 0.22.

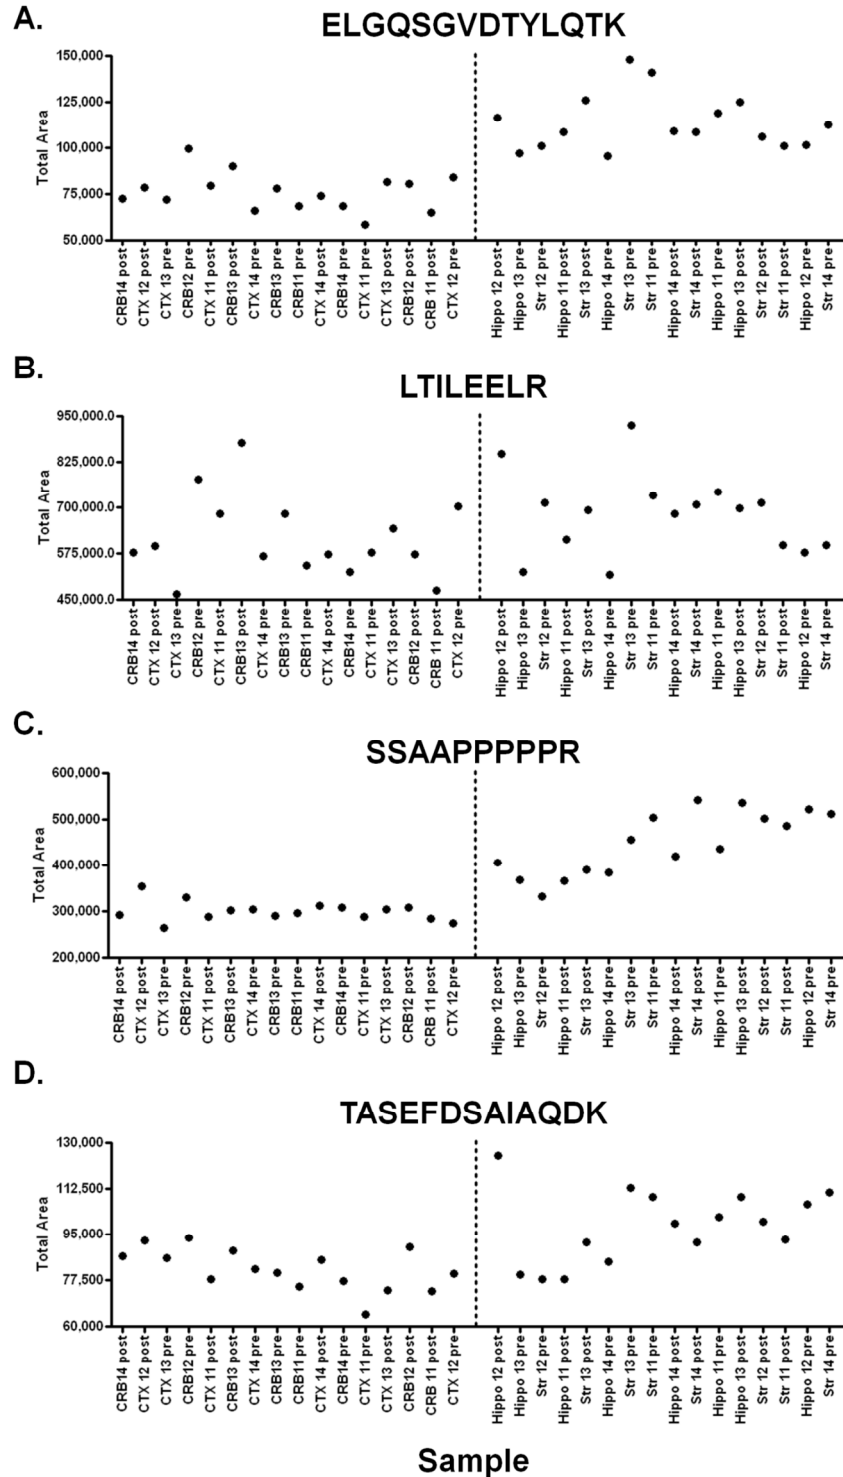

Supplemental Figure 2. Total area under the curve for internal reference peptides A) ELGQSGVDTYLQTK, B) LTILEELR, C) SSAAPPPPR, and D) TASEFDSAIAQDK added to G $\beta$  experimental samples. Dots represent total area for each experimental sample. Samples are arranged in chronological order in which they were analyzed via MRM. CTX,CRB and Hippo,Str samples were evaluated separately as they were run on separate days (depicted by hashed line). ELGQSGVDTYLQTK CTX,CRB CV: 0.05; Hippo,Str CV: 0.08; LTILEELR CTX,CRB CV: 0.04; Hippo,Str CV: 0.10; SSAAPPPPR CTX,CRB CV: 0.05; Hippo,Str CV: 0.05; TASEFDSAIAQDK CTX,CRB CV: 0.03; Hippo,Str CV: 0.05. CTX: cortex; CRB: cerebellum; Hippo: hippocampus; Str: striatum; pre: presynaptic fraction; post: postsynaptic fraction

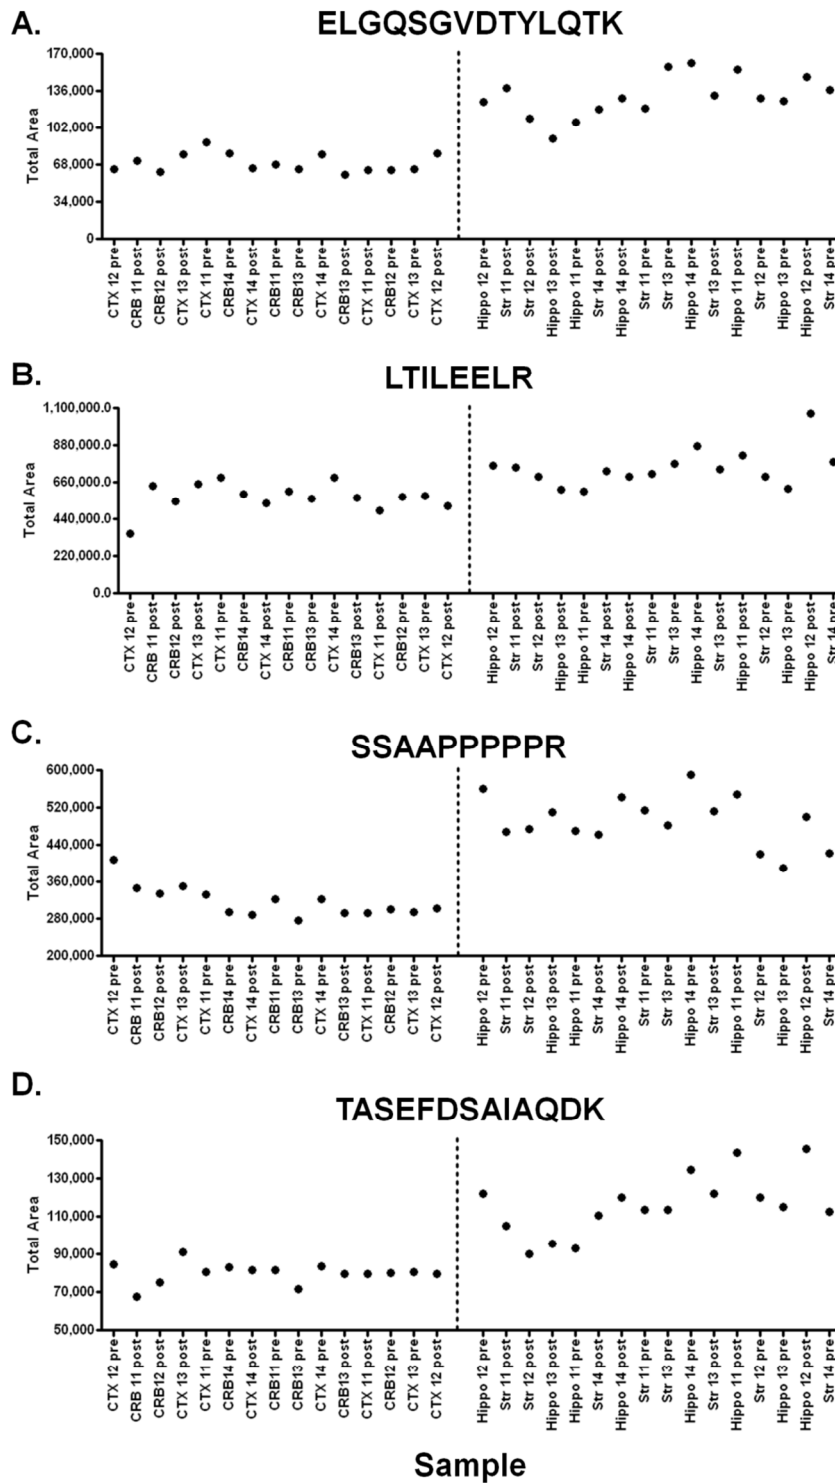

Supplemental Figure 3. Total area under the curve for internal reference peptides A) ELGQSGVDTYLQTK, B) LTILEELR, C) SSAAPPPPPR, and D) TASEFDSAIAQDK added to  $G\gamma$  experimental samples. Dots represent total area for each experimental sample. Samples are arranged in chronological order in which they were analyzed via MRM. CTX,CRB and Hippo,Str samples were evaluated separately as they were run on separate days (depicted by hashed line). ELGQSGVDTYLQTK CTX,CRB CV: 0.06; Hippo,Str CV: 0.03; LTILEELR CTX,CRB CV: 0.03; Hippo,Str CV: 0.05; SSAAPPPPPR CTX,CRB CV: 0.06; Hippo,Str CV: 0.06; TASEFDSAIAQDK CTX,CRB CV: 0.05; Hippo,Str CV: 0.07. CTX: cortex; CRB: cerebellum; Hippo: hippocampus; Str: striatum; pre: presynaptic fraction; post: postsynaptic fraction
