# Supplementary material
Source: PubMed Central journal article supplement (PMC4004276)
Supplement: bi500091p_si_002.pdf [file bi500091p_si_002.pdf]

| <b>Gβ<sub>1</sub></b>                                                         | <b>Fold Difference Numerator</b><br>(Fold Difference Numerator Raw Value) |                             |                              |                                |                              |                               |                               |                                 |                              |    |  |
|-------------------------------------------------------------------------------|---------------------------------------------------------------------------|-----------------------------|------------------------------|--------------------------------|------------------------------|-------------------------------|-------------------------------|---------------------------------|------------------------------|----|--|
|                                                                               |                                                                           | <b>CTX pre</b><br>(1.02E-4) | <b>CRB Pre</b><br>(8.03E-05) | <b>Hippo pre</b><br>(5.50E-05) | <b>Str pre</b><br>(4.48E-05) | <b>CTX post</b><br>(9.58E-05) | <b>CRB post</b><br>(6.86E-05) | <b>Hippo post</b><br>(7.74E-05) | <b>Str post</b><br>(1.18E-4) |    |  |
| <b>Fold Difference Denominator</b><br>(Fold Difference Denominator Raw Value) | <b>CTX pre</b><br>(1.02E-4)                                               | --                          | 0.79                         | 0.54                           | 0.44                         | 0.94                          |                               |                                 |                              |    |  |
|                                                                               | <b>CRB pre</b><br>(8.03E-05)                                              | 1.26                        | --                           | 0.68                           | 0.56                         | 0.85                          |                               |                                 |                              |    |  |
|                                                                               | <b>Hippo pre</b><br>(5.50E-05)                                            | 1.85                        | 1.46                         | --                             | 0.81                         | 1.41                          |                               |                                 |                              |    |  |
|                                                                               | <b>Str pre</b><br>(4.48E-05)                                              | 2.27                        | 1.79                         | 1.23                           | --                           | <b>2.63</b>                   |                               |                                 |                              |    |  |
|                                                                               | <b>CTX post</b><br>(9.58E-05)                                             | 1.06                        |                              |                                |                              | --                            | 0.72                          | 0.81                            | 1.23                         |    |  |
|                                                                               | <b>CRB post</b><br>(6.86E-05)                                             |                             |                              |                                |                              | 1.40                          | --                            | 1.13                            | 1.72                         |    |  |
|                                                                               | <b>Hippo post</b><br>(7.74E-05)                                           |                             |                              |                                |                              | 1.24                          | 0.89                          | --                              | 1.52                         |    |  |
|                                                                               | <b>Str post</b><br>(1.18E-4)                                              |                             |                              |                                |                              | 0.38                          | 0.81                          | 0.58                            | 0.66                         | -- |  |

**Supplementary Table 1. Fold differences comparing expression of G protein β<sub>1</sub> in pre or postsynaptic fractions between brain regions and pre and postsynaptic fractions within a brain region.** Fold differences comparing expression of Gβ<sub>1</sub> in postsynaptic fractions to Gβ<sub>1</sub> expression in presynaptic fractions within a brain region were calculated by dividing the total normalized area for Gβ<sub>1</sub> peptides within the postsynaptic fraction by the total normalized area for Gβ<sub>1</sub> peptides within the presynaptic fraction (e.g. CTX post/CTX pre). Fold differences comparing expression of Gβ<sub>1</sub> in presynaptic fractions within one brain region to presynaptic expression within another brain region were calculated by dividing the total normalized area for Gβ<sub>1</sub> in the presynaptic fraction of one brain region by expression in the presynaptic fraction within a second brain region (e.g. CTX pre/CRB pre). This was also done to compare expression of Gβ<sub>1</sub> in postsynaptic fractions between brain regions. Comparisons were not made between pre and postsynaptic fractions of different brain regions. Brain regions and raw total area values for the numerator in these calculations are shown along the top of the table, highlighted in bold and parentheses respectively. Brain regions and raw total area values for the denominator in these calculations are shown along the left of the table, highlighted in bold and parentheses respectively. Raw values and fold differences were rounded to two decimal places. Fold differences that are significant are shown in bold. CTX: cortex; CRB: cerebellum; Hippo: hippocampus; Str: striatum; pre: presynaptic fraction; post: postsynaptic fraction.

| <b>Gβ<sub>2</sub></b>                                                         | <b>Fold Difference Numerator</b><br>(Fold Difference Numerator Raw Value) |                             |                             |                               |                             |                              |                              |                                |                              |             |  |
|-------------------------------------------------------------------------------|---------------------------------------------------------------------------|-----------------------------|-----------------------------|-------------------------------|-----------------------------|------------------------------|------------------------------|--------------------------------|------------------------------|-------------|--|
|                                                                               |                                                                           | <b>CTX pre</b><br>(6.67E-5) | <b>CRB Pre</b><br>(4.81E-5) | <b>Hippo pre</b><br>(3.73E-5) | <b>Str pre</b><br>(3.65E-5) | <b>CTX post</b><br>(6.03E-5) | <b>CRB post</b><br>(4.93E-5) | <b>Hippo post</b><br>(6.46E-5) | <b>Str post</b><br>(1.38E-4) |             |  |
| <b>Fold Difference Denominator</b><br>(Fold Difference Denominator Raw Value) | <b>CTX pre</b><br>(6.67E-5)                                               | --                          | 0.72                        | 0.56                          | 0.55                        | 0.90                         |                              |                                |                              |             |  |
|                                                                               | <b>CRB pre</b><br>(4.81E-5)                                               | 1.39                        | --                          | 0.78                          | 0.76                        |                              | 1.03                         |                                |                              |             |  |
|                                                                               | <b>Hippo pre</b><br>(3.73E-5)                                             | 1.79                        | 1.29                        | --                            | 0.98                        |                              |                              | 1.73                           |                              |             |  |
|                                                                               | <b>Str pre</b><br>(3.65E-5)                                               | 1.83                        | 1.32                        | 1.02                          | --                          |                              |                              |                                |                              | <b>3.78</b> |  |
|                                                                               | <b>CTX post</b><br>(6.03E-5)                                              | 1.11                        |                             |                               |                             | --                           | 0.82                         | 1.07                           |                              | <b>2.28</b> |  |
|                                                                               | <b>CRB post</b><br>(4.93E-5)                                              |                             | 0.98                        |                               |                             | 1.22                         | --                           | 1.31                           |                              | <b>2.80</b> |  |
|                                                                               | <b>Hippo post</b><br>(6.46E-5)                                            |                             |                             | 0.58                          |                             | 0.93                         | 0.76                         | --                             |                              | <b>2.13</b> |  |
|                                                                               | <b>Str post</b><br>(1.38E-4)                                              |                             |                             |                               | 0.26                        | 0.44                         | 0.36                         | 0.47                           |                              | --          |  |

**Supplementary Table 2. Fold differences comparing expression of G protein β<sub>2</sub> in pre or postsynaptic fractions between brain regions and pre and postsynaptic fractions within a brain region.** Fold differences comparing expression of Gβ<sub>2</sub> in postsynaptic fractions to Gβ<sub>2</sub> expression in presynaptic fractions within a brain region were calculated by dividing the total normalized area for Gβ<sub>2</sub> peptides within the postsynaptic fraction by the total normalized area for Gβ<sub>2</sub> peptides within the presynaptic fraction (e.g. CTX post/CTX pre). Fold differences comparing expression of Gβ<sub>2</sub> in presynaptic fractions within one brain region to presynaptic expression within another brain region were calculated by dividing the total normalized area for Gβ<sub>2</sub> in the presynaptic fraction of one brain region by expression in the presynaptic fraction within a second brain region (e.g. CTX pre/CRB pre). This was also done to compare expression of Gβ<sub>2</sub> in postsynaptic fractions between brain regions. Comparisons were not made between pre and postsynaptic fractions of different brain regions. Brain regions and raw total area values for the numerator in these calculations are shown along the top of the table, highlighted in bold and parentheses respectively. Brain regions and raw total area values for the denominator in these calculations are shown along the left of the table, highlighted in bold and parentheses respectively. Raw values and fold differences were rounded to two decimal places. Fold differences that are significant are shown in bold. CTX: cortex; CRB: cerebellum; Hippo: hippocampus; Str: striatum; pre: presynaptic fraction; post: postsynaptic fraction.

| <b>Gβ<sub>4</sub></b>                                                         | <b>Fold Difference Numerator</b><br>(Fold Difference Numerator Raw Value) |                             |                             |                               |                             |                              |                              |                                |                              |
|-------------------------------------------------------------------------------|---------------------------------------------------------------------------|-----------------------------|-----------------------------|-------------------------------|-----------------------------|------------------------------|------------------------------|--------------------------------|------------------------------|
|                                                                               |                                                                           | <b>CTX pre</b><br>(3.12E-6) | <b>CRB pre</b><br>(3.61E-6) | <b>Hippo pre</b><br>(1.13E-6) | <b>Str pre</b><br>(1.29E-6) | <b>CTX post</b><br>(3.35E-6) | <b>CRB post</b><br>(4.84E-6) | <b>Hippo post</b><br>(2.51E-6) | <b>Str post</b><br>(5.23E-6) |
| <b>Fold Difference Denominator</b><br>(Fold Difference Denominator Raw Value) | <b>CTX pre</b><br>(3.12E-6)                                               | --                          | 1.16                        | 0.36                          | 0.41                        | 1.08                         |                              |                                |                              |
|                                                                               | <b>CRB pre</b><br>(3.61E-6)                                               | 0.86                        | --                          | 0.31                          | 0.36                        |                              | 1.34                         |                                |                              |
|                                                                               | <b>Hippo pre</b><br>(1.13E-6)                                             | 2.75                        | 3.19                        | --                            | 1.14                        |                              |                              | 2.22                           |                              |
|                                                                               | <b>Str pre</b><br>(1.29E-6)                                               | 2.42                        | 2.80                        | 0.88                          | --                          |                              |                              |                                | <b>4.06</b>                  |
|                                                                               | <b>CTX post</b><br>(3.35E-6)                                              | 0.93                        |                             |                               |                             | --                           | 1.44                         | 0.75                           | 1.56                         |
|                                                                               | <b>CRB post</b><br>(4.84E-6)                                              |                             | 0.75                        |                               |                             | 0.69                         | --                           | 0.52                           | 1.08                         |
|                                                                               | <b>Hippo post</b><br>(2.51E-6)                                            |                             |                             | 0.45                          |                             | 1.34                         | 1.93                         | --                             | 2.08                         |
|                                                                               | <b>Str post</b><br>(5.23E-6)                                              |                             |                             |                               | 0.25                        | 0.64                         | 0.92                         | 0.48                           | --                           |

**Supplementary Table 3. Fold differences comparing expression of G protein β<sub>4</sub> in pre or postsynaptic fractions between brain regions and pre and postsynaptic fractions within a brain region.** Fold differences comparing expression of Gβ<sub>4</sub> in postsynaptic fractions to Gβ<sub>4</sub> expression in presynaptic fractions within a brain region were calculated by dividing the total normalized area for Gβ<sub>4</sub> peptides within the postsynaptic fraction by the total normalized area for Gβ<sub>5</sub> peptides within the presynaptic fraction (e.g. CTX post/CTX pre). Fold differences comparing expression of Gβ<sub>4</sub> in presynaptic fractions within one brain region to presynaptic expression within another brain region were calculated by dividing the total normalized area for Gβ<sub>4</sub> in the presynaptic fraction of one brain region by expression in the presynaptic fraction within a second brain region (e.g. CTX pre/CRB pre). This was also done to compare expression of Gβ<sub>4</sub> in postsynaptic fractions between brain regions. Comparisons were not made between pre and postsynaptic fractions of different brain regions. Brain regions and raw total area values for the numerator in these calculations are shown along the top of the table, highlighted in bold and parentheses respectively. Brain regions and raw total area values for the denominator in these calculations are shown along the left of the table, highlighted in bold and parentheses respectively. Raw values and fold differences were rounded to two decimal places. Fold differences that are significant are shown in bold. CTX: cortex; CRB: cerebellum; Hippo: hippocampus; Str: striatum; pre: presynaptic fraction; post: postsynaptic fraction.

| <b>Gβ<sub>5</sub></b>                                                         | <b>Fold Difference Numerator</b><br>(Fold Difference Numerator Raw Value) |                          |                          |                            |                             |                           |                           |                             |                              |
|-------------------------------------------------------------------------------|---------------------------------------------------------------------------|--------------------------|--------------------------|----------------------------|-----------------------------|---------------------------|---------------------------|-----------------------------|------------------------------|
|                                                                               |                                                                           | <b>CTX pre</b><br>(N.D.) | <b>CRB pre</b><br>(N.D.) | <b>Hippo pre</b><br>(N.D.) | <b>Str pre</b><br>(2.48E-6) | <b>CTX post</b><br>(N.D.) | <b>CRB post</b><br>(N.D.) | <b>Hippo post</b><br>(N.D.) | <b>Str post</b><br>(1.01E-5) |
| <b>Fold Difference Denominator</b><br>(Fold Difference Denominator Raw Value) | <b>CTX pre</b><br>(N.D.)                                                  |                          |                          |                            |                             |                           |                           |                             |                              |
|                                                                               | <b>CRB pre</b><br>(N.D.)                                                  |                          |                          |                            |                             |                           |                           |                             |                              |
|                                                                               | <b>Hippo pre</b><br>(N.D.)                                                |                          |                          |                            |                             |                           |                           |                             |                              |
|                                                                               | <b>Str pre</b><br>(2.48E-6)                                               |                          |                          |                            | --                          |                           |                           |                             | <b>4.07</b>                  |
|                                                                               | <b>CTX post</b><br>(N.D.)                                                 |                          |                          |                            |                             |                           |                           |                             |                              |
|                                                                               | <b>CRB post</b><br>(N.D.)                                                 |                          |                          |                            |                             |                           |                           |                             |                              |
|                                                                               | <b>Hippo post</b><br>(N.D.)                                               |                          |                          |                            |                             |                           |                           |                             |                              |
|                                                                               | <b>Str post</b><br>(1.01E-5)                                              |                          |                          |                            | 0.25                        |                           |                           |                             | --                           |

**Supplementary Table 4. Fold differences comparing expression of G protein β<sub>5</sub> in pre and postsynaptic fractions within the striatum.** Fold differences comparing expression of Gβ<sub>5</sub> in the striatum within postsynaptic fractions to Gβ<sub>5</sub> expression within presynaptic fractions were calculated by dividing the total normalized area for Gβ<sub>5</sub> peptides within the postsynaptic fraction by the total normalized area for Gβ<sub>5</sub> peptides within the presynaptic fraction. Brain regions and raw total area values for the numerator in these calculations are shown along the top of the table, highlighted in bold and parentheses respectively. Brain regions and raw total area values for the denominator in these calculations are shown along the left of the table, highlighted in bold and parentheses respectively. Raw values and fold differences were rounded to two decimal places. Fold differences that are significant are shown in bold. CTX: cortex; CRB: cerebellum; Hippo: hippocampus; Str: striatum; pre: presynaptic fraction; post: postsynaptic fraction; N.D.: not detected.

| <b>G<math>\gamma</math><sub>2</sub></b>                                       | <b>Fold Difference Numerator</b><br>(Fold Difference Numerator Raw Value) |                             |                             |                               |                             |                              |                              |                                |                              |
|-------------------------------------------------------------------------------|---------------------------------------------------------------------------|-----------------------------|-----------------------------|-------------------------------|-----------------------------|------------------------------|------------------------------|--------------------------------|------------------------------|
|                                                                               |                                                                           | <b>CTX pre</b><br>(1.66E-6) | <b>CRB pre</b><br>(5.74E-7) | <b>Hippo pre</b><br>(1.74E-6) | <b>Str pre</b><br>(5.25E-7) | <b>CTX post</b><br>(1.74E-6) | <b>CRB post</b><br>(9.03E-7) | <b>Hippo post</b><br>(3.26E-6) | <b>Str post</b><br>(2.10E-6) |
| <b>Fold Difference Denominator</b><br>(Fold Difference Denominator Raw Value) | <b>CTX pre</b><br>(1.66E-6)                                               | --                          | 0.34                        | 1.05                          | 0.32                        | 1.05                         |                              |                                |                              |
|                                                                               | <b>CRB pre</b><br>(5.74E-7)                                               | 2.90                        | --                          | 3.04                          | 0.92                        |                              | 1.57                         |                                |                              |
|                                                                               | <b>Hippo pre</b><br>(1.74E-6)                                             | 0.96                        | 0.33                        | --                            | 0.30                        |                              |                              | 1.87                           |                              |
|                                                                               | <b>Str pre</b><br>(5.25E-7)                                               | 3.17                        | 1.09                        | 3.32                          | --                          |                              |                              |                                | 3.99                         |
|                                                                               | <b>CTX post</b><br>(1.74E-6)                                              | 0.96                        |                             |                               |                             | --                           | 0.52                         | 1.87                           | 1.20                         |
|                                                                               | <b>CRB post</b><br>(9.03E-7)                                              |                             | 0.64                        |                               |                             | 1.93                         | --                           | <b>3.61</b>                    | 2.32                         |
|                                                                               | <b>Hippo post</b><br>(3.26E-6)                                            |                             |                             | 0.53                          |                             | 0.53                         | 0.28                         | --                             | 0.64                         |
|                                                                               | <b>Str post</b><br>(2.10E-6)                                              |                             |                             |                               | 0.25                        | 0.83                         | 0.43                         | 1.56                           | --                           |

**Supplementary Table 5. Fold differences comparing expression of G protein  $\gamma_2$  in pre or postsynaptic fractions between brain regions and pre and postsynaptic fractions within a brain region.** Fold differences comparing expression of G $\gamma_2$  in postsynaptic fractions to G $\gamma_2$  expression in presynaptic fractions within a brain region were calculated by dividing the total normalized area for G $\gamma_2$  peptides within the postsynaptic fraction by the total normalized area for G $\gamma_2$  peptides within the presynaptic fraction (e.g. CTX post/CTX pre). Fold differences comparing expression of G $\gamma_2$  in presynaptic fractions within one brain region to presynaptic expression within another brain region were calculated by dividing the total normalized area for G $\gamma_2$  in the presynaptic fraction of one brain region by expression in the presynaptic fraction within a second brain region (e.g. CTX pre/CRB pre). This was also done to compare expression of G $\gamma_2$  in postsynaptic fractions between brain regions. Comparisons were not made between pre and postsynaptic fractions of different brain regions. Brain regions and raw total area values for the numerator in these calculations are shown along the top of the table, highlighted in bold and parentheses respectively. Brain regions and raw total area values for the denominator in these calculations are shown along the left of the table, highlighted in bold and parentheses respectively. Raw values and fold differences were rounded to two decimal places. Fold differences that are significant are shown in bold. CTX: cortex; CRB: cerebellum; Hippo: hippocampus; Str: striatum; pre: presynaptic fraction; post: postsynaptic fraction.

| <b>G<math>\gamma_3</math></b>                                                 | <b>Fold Difference Numerator</b><br>(Fold Difference Numerator Raw Value) |                             |                             |                               |                             |                              |                              |                                |                              |
|-------------------------------------------------------------------------------|---------------------------------------------------------------------------|-----------------------------|-----------------------------|-------------------------------|-----------------------------|------------------------------|------------------------------|--------------------------------|------------------------------|
|                                                                               |                                                                           | <b>CTX pre</b><br>(7.84E-6) | <b>CRB pre</b><br>(7.84E-6) | <b>Hippo pre</b><br>(2.51E-6) | <b>Str pre</b><br>(8.06E-7) | <b>CTX post</b><br>(1.45E-5) | <b>CRB post</b><br>(5.25E-6) | <b>Hippo post</b><br>(7.62E-6) | <b>Str post</b><br>(1.04E-5) |
| <b>Fold Difference Denominator</b><br>(Fold Difference Denominator Raw Value) | <b>CTX pre</b><br>(7.84E-6)                                               | --                          | 0.40                        | 0.32                          | 0.10                        | 1.85                         |                              |                                |                              |
|                                                                               | <b>CRB pre</b><br>(7.84E-6)                                               | 2.47                        | --                          | 0.79                          | 0.25                        |                              | 1.66                         |                                |                              |
|                                                                               | <b>Hippo pre</b><br>(2.51E-6)                                             | 3.13                        | 1.26                        | --                            | 0.32                        |                              |                              | 3.04                           |                              |
|                                                                               | <b>Str pre</b><br>(8.06E-7)                                               | 9.73                        | 3.93                        | 3.11                          | --                          |                              |                              |                                | <b>12.90</b>                 |
|                                                                               | <b>CTX post</b><br>(1.45E-5)                                              | 0.54                        |                             |                               |                             | --                           | 0.36                         | 0.52                           | 0.72                         |
|                                                                               | <b>CRB post</b><br>(5.25E-6)                                              |                             | 0.60                        |                               |                             | 2.76                         | --                           | 1.45                           | 1.98                         |
|                                                                               | <b>Hippo post</b><br>(7.62E-6)                                            |                             |                             | 0.33                          |                             | 1.91                         | 0.69                         | --                             | 1.36                         |
|                                                                               | <b>Str post</b><br>(1.04E-5)                                              |                             |                             |                               | 0.08                        | 1.40                         | 0.51                         | 0.73                           | --                           |

**Supplementary Table 6. Fold differences comparing expression of G protein  $\gamma_3$  in pre or postsynaptic fractions between brain regions and pre and postsynaptic fractions within a brain region.** Fold differences comparing expression of G $\gamma_3$  in postsynaptic fractions to G $\gamma_3$  expression in presynaptic fractions within a brain region were calculated by dividing the total normalized area for G $\gamma_3$  peptides within the postsynaptic fraction by the total normalized area for G $\gamma_3$  peptides within the presynaptic fraction (e.g. CTX post/CTX pre). Fold differences comparing expression of G $\gamma_3$  in presynaptic fractions within one brain region to presynaptic expression within another brain region were calculated by dividing the total normalized area for G $\gamma_3$  in the presynaptic fraction of one brain region by expression in the presynaptic fraction within a second brain region (e.g. CTX pre/CRB pre). This was also done to compare expression of G $\gamma_3$  in postsynaptic fractions between brain regions. Comparisons were not made between pre and postsynaptic fractions of different brain regions. Brain regions and raw total area values for the numerator in these calculations are shown along the top of the table, highlighted in bold and parentheses respectively. Brain regions and raw total area values for the denominator in these calculations are shown along the left of the table, highlighted in bold and parentheses respectively. Raw values and fold differences were rounded to two decimal places. Fold differences that are significant are shown in bold. CTX: cortex; CRB: cerebellum; Hippo: hippocampus; Str: striatum; pre: presynaptic fraction; post: postsynaptic fraction.

| <b>G<math>\gamma_4</math></b>                                                 | <b>Fold Difference Numerator</b><br>(Fold Difference Numerator Raw Value) |                             |                             |                               |                             |                              |                              |                                |                              |
|-------------------------------------------------------------------------------|---------------------------------------------------------------------------|-----------------------------|-----------------------------|-------------------------------|-----------------------------|------------------------------|------------------------------|--------------------------------|------------------------------|
|                                                                               |                                                                           | <b>CTX pre</b><br>(5.09E-7) | <b>CRB pre</b><br>(1.49E-7) | <b>Hippo pre</b><br>(3.51E-7) | <b>Str pre</b><br>(2.22E-7) | <b>CTX post</b><br>(5.42E-7) | <b>CRB post</b><br>(2.15E-7) | <b>Hippo post</b><br>(8.61E-7) | <b>Str post</b><br>(8.26E-7) |
| <b>Fold Difference Denominator</b><br>(Fold Difference Denominator Raw Value) | <b>CTX pre</b><br>(5.09E-7)                                               | --                          | 0.29                        | 0.69                          | 0.44                        | 1.06                         |                              |                                |                              |
|                                                                               | <b>CRB pre</b><br>(1.49E-7)                                               | 3.42                        | --                          | 2.36                          | 1.49                        |                              | 1.45                         |                                |                              |
|                                                                               | <b>Hippo pre</b><br>(3.51E-7)                                             | 1.45                        | 0.42                        | --                            | 0.63                        |                              |                              | 2.45                           |                              |
|                                                                               | <b>Str pre</b><br>(2.22E-7)                                               | 2.29                        | 0.67                        | 1.58                          | --                          |                              |                              |                                | <b>3.71</b>                  |
|                                                                               | <b>CTX post</b><br>(5.42E-7)                                              | 0.94                        |                             |                               |                             | --                           | 0.40                         | 1.59                           | 1.52                         |
|                                                                               | <b>CRB post</b><br>(2.15E-7)                                              |                             | 0.69                        |                               |                             | 2.52                         | --                           | <b>4.00</b>                    | <b>3.83</b>                  |
|                                                                               | <b>Hippo post</b><br>(8.61E-7)                                            |                             |                             | 0.41                          |                             | 0.63                         | 0.25                         | --                             | 0.96                         |
|                                                                               | <b>Str post</b><br>(8.26E-7)                                              |                             |                             |                               | 0.27                        | 0.66                         | 0.26                         | 1.04                           | --                           |

**Supplementary Table 7. Fold differences comparing expression of G protein  $\gamma_4$  in pre or postsynaptic fractions between brain regions and pre and postsynaptic fractions within a brain region.** Fold differences comparing expression of G $\gamma_4$  in postsynaptic fractions to G $\gamma_4$  expression in presynaptic fractions within a brain region were calculated by dividing the total normalized area for G $\gamma_4$  peptides within the postsynaptic fraction by the total normalized area for G $\gamma_4$  peptides within the presynaptic fraction (e.g. CTX post/CTX pre). Fold differences comparing expression of G $\gamma_4$  in presynaptic fractions within one brain region to presynaptic expression within another brain region were calculated by dividing the total normalized area for G $\gamma_4$  in the presynaptic fraction of one brain region by expression in the presynaptic fraction within a second brain region (e.g. CTX pre/CRB pre). This was also done to compare expression of G $\gamma_4$  in postsynaptic fractions between brain regions. Comparisons were not made between pre and postsynaptic fractions of different brain regions. Brain regions and raw total area values for the numerator in these calculations are shown along the top of the table, highlighted in bold and parentheses respectively. Brain regions and raw total area values for the denominator in these calculations are shown along the left of the table, highlighted in bold and parentheses respectively. Raw values and fold differences were rounded to two decimal places. Fold differences that are significant are shown in bold. CTX: cortex; CRB: cerebellum; Hippo: hippocampus; Str: striatum; pre: presynaptic fraction; post: postsynaptic fraction.

| <b>G<math>\gamma</math><sub>7</sub></b>                                       | <b>Fold Difference Numerator</b><br>(Fold Difference Numerator Raw Value) |                             |                             |                               |                             |                              |                              |                                |                              |
|-------------------------------------------------------------------------------|---------------------------------------------------------------------------|-----------------------------|-----------------------------|-------------------------------|-----------------------------|------------------------------|------------------------------|--------------------------------|------------------------------|
|                                                                               |                                                                           | <b>CTX pre</b><br>(4.51E-6) | <b>CRB pre</b><br>(1.97E-6) | <b>Hippo pre</b><br>(3.97E-6) | <b>Str pre</b><br>(7.74E-6) | <b>CTX post</b><br>(7.85E-6) | <b>CRB post</b><br>(5.11E-6) | <b>Hippo post</b><br>(1.37E-5) | <b>Str post</b><br>(4.29E-5) |
| <b>Fold Difference Denominator</b><br>(Fold Difference Denominator Raw Value) | <b>CTX pre</b><br>(4.51E-6)                                               | --                          | 0.44                        | 0.88                          | 1.72                        | 1.74                         |                              |                                |                              |
|                                                                               | <b>CRB pre</b><br>(1.97E-6)                                               | 2.29                        | --                          | 2.01                          | 3.93                        |                              | 2.59                         |                                |                              |
|                                                                               | <b>Hippo pre</b><br>(3.97E-6)                                             | 1.14                        | 0.50                        | --                            | 1.95                        |                              |                              | 3.46                           |                              |
|                                                                               | <b>Str pre</b><br>(7.74E-6)                                               | 0.58                        | 0.25                        | 0.51                          | --                          |                              |                              |                                | <b>5.55</b>                  |
|                                                                               | <b>CTX post</b><br>(7.85E-6)                                              | 0.57                        |                             |                               |                             | --                           | 0.65                         | 1.75                           | <b>5.47</b>                  |
|                                                                               | <b>CRB post</b><br>(5.11E-6)                                              |                             | 0.39                        |                               |                             | 1.54                         | --                           | 2.69                           | <b>8.41</b>                  |
|                                                                               | <b>Hippo post</b><br>(1.37E-5)                                            |                             |                             | 0.29                          |                             | 0.57                         | 0.37                         | --                             | <b>3.13</b>                  |
|                                                                               | <b>Str post</b><br>(4.29E-5)                                              |                             |                             |                               | 0.18                        | 0.18                         | 0.12                         | 0.32                           | --                           |

**Supplementary Table 8. Fold differences comparing expression of G protein  $\gamma_7$  in pre or postsynaptic fractions between brain regions and pre and postsynaptic fractions within a brain region.** Fold differences comparing expression of G $\gamma_7$  in postsynaptic fractions to G $\gamma_7$  expression in presynaptic fractions within a brain region were calculated by dividing the total normalized area for G $\gamma_7$  peptides within the postsynaptic fraction by the total normalized area for G $\gamma_7$  peptides within the presynaptic fraction (e.g. CTX post/CTX pre). Fold differences comparing expression of G $\gamma_7$  in presynaptic fractions within one brain region to presynaptic expression within another brain region were calculated by dividing the total normalized area for G $\gamma_7$  in the presynaptic fraction of one brain region by expression in the presynaptic fraction within a second brain region (e.g. CTX pre/CRB pre). This was also done to compare expression of G $\gamma_7$  in postsynaptic fractions between brain regions. Comparisons were not made between pre and postsynaptic fractions of different brain regions. Brain regions and raw total area values for the numerator in these calculations are shown along the top of the table, highlighted in bold and parentheses respectively. Brain regions and raw total area values for the denominator in these calculations are shown along the left of the table, highlighted in bold and parentheses respectively. Raw values and fold differences were rounded to two decimal places. Fold differences that are significant are shown in bold. CTX: cortex; CRB: cerebellum; Hippo: hippocampus; Str: striatum; pre: presynaptic fraction; post: postsynaptic fraction.



| $G\gamma_{12}$                                                         | Fold Difference Numerator<br>(Fold Difference Numerator Raw Value) |                      |                      |                        |                      |                       |                       |                         |                       |
|------------------------------------------------------------------------|--------------------------------------------------------------------|----------------------|----------------------|------------------------|----------------------|-----------------------|-----------------------|-------------------------|-----------------------|
|                                                                        |                                                                    | CTX pre<br>(6.44E-6) | CRB pre<br>(5.08E-6) | Hippo pre<br>(2.43E-6) | Str pre<br>(1.42E-6) | CTX post<br>(1.81E-5) | CRB post<br>(1.60E-5) | Hippo post<br>(1.30E-5) | Str post<br>(1.49E-5) |
| Fold Difference Denominator<br>(Fold Difference Denominator Raw Value) | CTX pre<br>(6.44E-6)                                               | --                   | 0.79                 | 0.38                   | 0.22                 | <b>2.81</b>           |                       |                         |                       |
|                                                                        | CRB pre<br>(5.08E-6)                                               | 1.27                 | --                   | 0.48                   | 0.28                 |                       | <b>3.16</b>           |                         |                       |
|                                                                        | Hippo pre<br>(2.43E-6)                                             | 2.65                 | 2.09                 | --                     | 0.58                 |                       |                       | <b>5.36</b>             |                       |
|                                                                        | Str pre<br>(1.42E-6)                                               | 4.53                 | 3.57                 | 1.71                   | --                   |                       |                       |                         | <b>10.46</b>          |
|                                                                        | CTX post<br>(1.81E-5)                                              | 0.36                 |                      |                        |                      | --                    | 0.89                  | 0.72                    | 0.82                  |
|                                                                        | CRB post<br>(1.60E-5)                                              |                      | 0.32                 |                        |                      | 1.13                  | --                    | 0.81                    | 0.93                  |
|                                                                        | Hippo post<br>(1.30E-5)                                            |                      |                      | 0.19                   |                      | 1.39                  | 1.23                  | --                      | 1.14                  |
|                                                                        | Str post<br>(1.49E-5)                                              |                      |                      |                        | 0.10                 | 1.22                  | 1.08                  | 0.88                    | --                    |

**Supplementary Table 9. Fold differences comparing expression of G protein  $\gamma_{12}$  in pre or postsynaptic fractions between brain regions and pre and postsynaptic fractions within a brain region.** Fold differences comparing expression of  $G\gamma_{12}$  in postsynaptic fractions to  $G\gamma_{12}$  expression in presynaptic fractions within a brain region were calculated by dividing the total normalized area for  $G\gamma_{12}$  peptides within the postsynaptic fraction by the total normalized area for  $G\gamma_{12}$  peptides within the presynaptic fraction (e.g. CTX post/CTX pre). Fold differences comparing expression of  $G\gamma_{12}$  in presynaptic fractions within one brain region to presynaptic expression within another brain region were calculated by dividing the total normalized area for  $G\gamma_{12}$  in the presynaptic fraction of one brain region by expression in the presynaptic fraction within a second brain region (e.g. CTX pre/CRB pre). This was also done to compare expression of  $G\gamma_{12}$  in postsynaptic fractions between brain regions. Comparisons were not made between pre and postsynaptic fractions of different brain regions. Brain regions and raw total area values for the numerator in these calculations are shown along the top of the table, highlighted in bold and parentheses respectively. Brain regions and raw total area values for the denominator in these calculations are shown along the left of the table, highlighted in bold and parentheses respectively. Raw values and fold differences were rounded to two decimal places. Fold differences that are significant are shown in bold. CTX: cortex; CRB: cerebellum; Hippo: hippocampus; Str: striatum; pre: presynaptic fraction; post: postsynaptic fraction.

| $G\gamma_{13}$                                                                | Fold Difference Numerator<br>(Fold Difference Numerator Raw Value) |                             |                             |                               |                             |                              |                              |                                |                              |
|-------------------------------------------------------------------------------|--------------------------------------------------------------------|-----------------------------|-----------------------------|-------------------------------|-----------------------------|------------------------------|------------------------------|--------------------------------|------------------------------|
|                                                                               |                                                                    | <b>CTX pre</b><br>(9.11E-6) | <b>CRB pre</b><br>(5.32E-6) | <b>Hippo pre</b><br>(2.26E-6) | <b>Str pre</b><br>(1.04E-6) | <b>CTX post</b><br>(1.10E-5) | <b>CRB post</b><br>(1.18E-5) | <b>Hippo post</b><br>(4.96E-6) | <b>Str post</b><br>(3.86E-6) |
| <b>Fold Difference Denominator</b><br>(Fold Difference Denominator Raw Value) | <b>CTX pre</b><br>(9.11E-6)                                        | --                          | 0.58                        | 0.25                          | 0.11                        | 1.21                         |                              |                                |                              |
|                                                                               | <b>CRB pre</b><br>(5.32E-6)                                        | 1.71                        | --                          | 0.43                          | 0.20                        |                              | <b>2.22</b>                  |                                |                              |
|                                                                               | <b>Hippo pre</b><br>(2.26E-6)                                      | <b>4.03</b>                 | 2.35                        | --                            | 0.46                        |                              |                              | 2.19                           |                              |
|                                                                               | <b>Str pre</b><br>(1.04E-6)                                        | <b>8.76</b>                 | 5.12                        | 2.18                          | --                          |                              |                              |                                | 3.71                         |
|                                                                               | <b>CTX post</b><br>(1.10E-5)                                       | 0.83                        |                             |                               |                             | --                           | 1.07                         | 0.45                           | 0.35                         |
|                                                                               | <b>CRB post</b><br>(1.18E-5)                                       |                             | 0.45                        |                               |                             | 0.93                         | --                           | 0.42                           | 0.33                         |
|                                                                               | <b>Hippo post</b><br>(4.96E-6)                                     |                             |                             | 0.46                          |                             | 2.22                         | <b>2.38</b>                  | --                             | 0.79                         |
|                                                                               | <b>Str post</b><br>(3.86E-6)                                       |                             |                             |                               | 0.27                        | <b>2.86</b>                  | <b>3.06</b>                  | 1.29                           | --                           |

**Supplementary Table 10. Fold differences comparing expression of G protein  $\gamma_{13}$  in pre or postsynaptic fractions between brain regions and pre and postsynaptic fractions within a brain region.** Fold differences comparing expression of  $G\gamma_{13}$  in postsynaptic fractions to  $G\gamma_{13}$  expression in presynaptic fractions within a brain region were calculated by dividing the total normalized area for  $G\gamma_{13}$  peptides within the postsynaptic fraction by the total normalized area for  $G\gamma_{13}$  peptides within the presynaptic fraction (e.g. CTX post/CTX pre). Fold differences comparing expression of  $G\gamma_{13}$  in presynaptic fractions within one brain region to presynaptic expression within another brain region were calculated by dividing the total normalized area for  $G\gamma_{13}$  in the presynaptic fraction of one brain region by expression in the presynaptic fraction within a second brain region (e.g. CTX pre/CRB pre). This was also done to compare expression of  $G\gamma_{13}$  in postsynaptic fractions between brain regions. Comparisons were not made between pre and postsynaptic fractions of different brain regions. Brain regions and raw total area values for the numerator in these calculations are shown along the top of the table, highlighted in bold and parentheses respectively. Brain regions and raw total area values for the denominator in these calculations are shown along the left of the table, highlighted in bold and parentheses respectively. Raw values and fold differences were rounded to two decimal places. Fold differences that are significant are shown in bold. CTX: cortex; CRB: cerebellum; Hippo: hippocampus; Str: striatum; pre: presynaptic fraction; post: postsynaptic fraction.
